# Supplementary material
Source: HighWire-hosted journal article supplement (https://gut.bmj.com/highwire/filestream/193032/field_highwire_adjunct_files/5/Tsilingiri_et._al._Sup._Fig._5.pdf)
Supplement: Tsilingiri_et._al._Sup._Fig._5.pdf [file Tsilingiri_et._al._Sup._Fig._5.pdf]

**CCL4**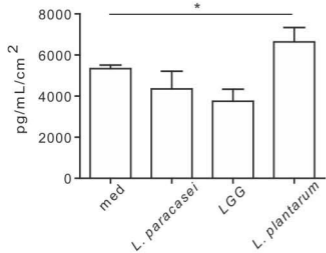**IL10**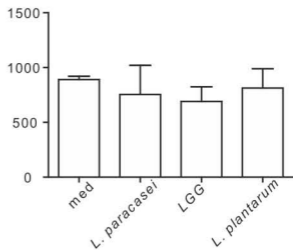**IL1b**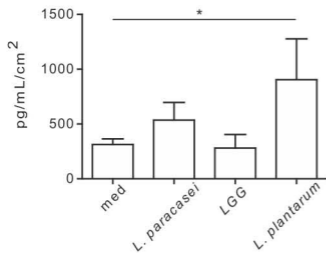**TNF**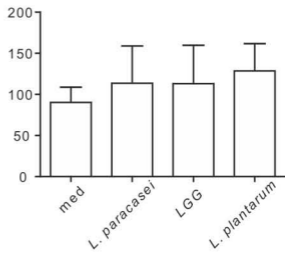

Suppl. Fig. 5: Cytokine secretion profiles after probiotic inoculation in healthy tissues. Tissues were stimulated with the indicated probiotics ( $4 \times 10^7$  CFU/cm<sup>2</sup>) as described and cytokine and chemokine secretion in the basolateral supernatant was measured by CBA. Error bars represent SEM between 5 samples and statistical significance was measured by ANOVA.
